# Supplementary material for: Acceptability and Willingness to Use HIV Pre-Exposure Prophylaxis among Female Sex Workers in Lagos State, Nigeria: A Cross-Sectional Study
Source: Research Square preprint supplement (doi:10.21203/rs.3.rs-7066966/v2), 2026-01-26
Supplement: Supplementary file 1 [file 420256a423ef892dcf06125e.pdf]

### Appendix A: Measurement and Scale Reliability

This appendix provides the internal consistency estimates (Cronbach's alpha) for the composite scales used as the dependent variables in the multivariable linear regression models, validating their use in the analysis.

**Table A.1: Internal Consistency of PrEP Scales (Cronbach's alpha)**

| Scale                           | Number of Items | Average Inter-Item Covariance | Cronbach's Coefficient alpha | Interpretation |
|---------------------------------|-----------------|-------------------------------|------------------------------|----------------|
| <b>PrEP Acceptability Score</b> | 6               | 0.4197                        | <b>0.8446</b>                | Good           |
| <b>PrEP Willingness Score</b>   | 8               | 0.1629                        | <b>0.6482</b>                | Acceptable     |

#### Note on Interpretation

- The **PrEP Acceptability Score** (alpha = 0.8446) demonstrates **Good** internal consistency, exceeding the common threshold of 0.70.
- The **PrEP Willingness Score** (alpha = 0.6482) is slightly below the conventional 0.70 threshold, but is often deemed **Acceptable** for newly adapted or exploratory scales, particularly in early research stages. Its use in the MLR is justifiable, but the interpretation of its findings is acknowledged on this lower reliability.

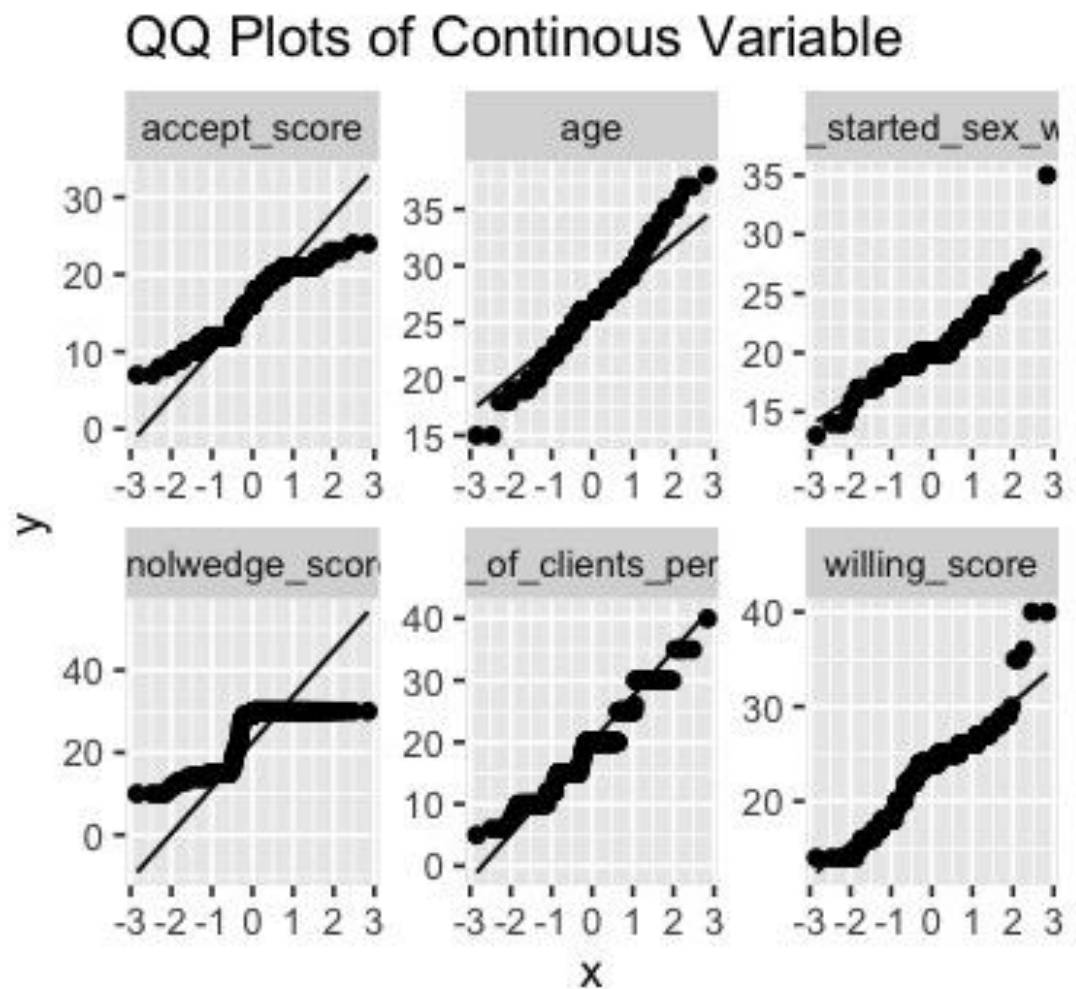

Figure 1: QQ plots of variables

Table 1: Normality test of distribution of variables

| Variable   | Role MLR  | in Skewne ss Value | Skewness Type     | Shapir o-Wilk p-value | Normalit y Conclusi on | Data Transformati on | Modeling Strategy Justification                                                                                |
|------------|-----------|--------------------|-------------------|-----------------------|------------------------|----------------------|----------------------------------------------------------------------------------------------------------------|
| Age (Mean) | Predictor | ≈0.00              | None (Symmetri c) | 0.235                 | Normal                 | none                 | Retained as continuous. Preserves maximum statistical power and satisfies normality assumption for predictors. |

This study has been approved by the Lagos University Teaching Hospital Human Research Ethics Committee (LUTH-HREC Approval No: ADM/DCST/HREC/APP/5093).

# Acceptability and Willingness to Use HIV Pre-Exposure Prophylaxis among Female Sex Workers in Lagos State, Nigeria: A Cross-Sectional Study

| Variable                    | Role in MLR           | Skewness Value | Skewness Type                 | Shapiro-Wilk <i>p</i> -value | Normality Conclusion   | Data Transformation   | Modeling Strategy Justification                                                                                                                                                                                                                                                                                                                 |
|-----------------------------|-----------------------|----------------|-------------------------------|------------------------------|------------------------|-----------------------|-------------------------------------------------------------------------------------------------------------------------------------------------------------------------------------------------------------------------------------------------------------------------------------------------------------------------------------------------|
| Age at Sex Work Initiation  | Predictor             | +1.12          | Strong Positive (Right Skew)  | <0.001                       | Severely non-normal    | Root transformation = | Categorized by quartiles. Justified by strong right skew and significant non-normality. Quartiles represent a data-driven, non-arbitrary grouping method. Retained as continuous for MLR. Minor skew permits reliance on Central Limit Theorem ( $N = 221$ ). Low skewness (<0.5) and kurtosis near normal (2.74) support continuous treatment. |
| Number of Clients per Month | Predictor             | +0.36          | Minor Positive (Right Skew)   | 0.008                        | Technically non-normal |                       | Categorized by tertiles. Justified by moderate left skew and Q-Q plot deviations. Tertiles provide balanced low/medium/high knowledge groups, addressing reviewer concerns about median splits.                                                                                                                                                 |
| PrEP Knowledge Score        | Predictor (Covariate) | -0.63          | Moderate Negative (Left Skew) | <0.001                       | Severely non-normal    |                       |                                                                                                                                                                                                                                                                                                                                                 |

This study has been approved by the Lagos University Teaching Hospital Human Research Ethics Committee (LUTH-HREC Approval No: ADM/DCST/HREC/APP/5093).

Acceptability and Willingness to Use HIV Pre-Exposure Prophylaxis among Female Sex Workers in Lagos State, Nigeria: A Cross-Sectional Study

| Variable               | Role in MLR | Skewness Value | Skewness Type               | Shapiro-Wilk p-value | Normality Conclusion   | Data Transformation | Modeling Strategy Justification                                                                                                                    |
|------------------------|-------------|----------------|-----------------------------|----------------------|------------------------|---------------------|----------------------------------------------------------------------------------------------------------------------------------------------------|
| PrEP Acceptance Score  | Outcome     | -0.22          | Minor Negative (Left Skew)  | <0.001               | Technically non-normal |                     | Retained as continuous for MLR. Minor skew permits reliance on Central Limit Theorem ( $N = 223$ ). Normality of residuals assessed post-modeling. |
| PrEP Willingness Score | Outcome     | +0.20          | Minor Positive (Right Skew) | <0.001               | Technically non-normal |                     | Retained as continuous for MLR. Minor skew permits reliance on Central Limit Theorem ( $N = 223$ ). Normality of residuals assessed post-modeling. |

Table 2. Summary of Predictor Transformations and Final Status in MLR

| Original Predictor                | Final Predictor (Used in MLR)      | Initial Skewness | Pre-Transformation Normality Test (W / p) | Post-Transformation Normality Test (W / p) | Final Status in MLR                                                                                                 |
|-----------------------------------|------------------------------------|------------------|-------------------------------------------|--------------------------------------------|---------------------------------------------------------------------------------------------------------------------|
| Age Started Sex Work (continuous) | age_start_quartile s (categorical) | +1.116 (Severe)  | 0.93 / <0.001 (Rejected)                  | 0.80 / <0.001 (Worsened)                   | Categorized into quartiles (transformation unsuccessful; categorization chosen for stability and interpretability). |

This study has been approved by the Lagos University Teaching Hospital Human Research Ethics Committee (LUTH-HREC Approval No: ADM/DCST/HREC/APP/5093).

| Original Predictor                | Final Predictor (Used in MLR)    | Predictor Initial Skewness | Pre-Transformation Normality Test (W / p) | Post-Transformation Normality Test (W / p)                      | Final Status in MLR                                                                        |
|-----------------------------------|----------------------------------|----------------------------|-------------------------------------------|-----------------------------------------------------------------|--------------------------------------------------------------------------------------------|
| Clients per Month (continuous)    | Excluded                         | +0.36 (Mild)               | 0.97 / 0.008                              | Not Applicable (raw data used; mild skewness).                  | Excluded (not statistically significant in bivariate screening).                           |
| PrEP Knowledge Score (continuous) | knowledge_tertiles (categorical) | -0.630 (Moderate)          | 0.92 / <0.001 (Rejected)                  | Log: 0.723 / <0.001; Root/Squared: 0.706 / <0.001 (Both failed) | Categorized into tertiles (transformation unsuccessful; improved stability and model fit). |

#### Appendix D: Final Multivariable Linear Regression Diagnostics

This appendix confirms that the final models met the key statistical assumptions required for MLR.

##### Assumption of Homoscedasticity

Both final models passed the Non-constant Variance Test ( $p > 0.05$ ), confirming **constant error variance**. Accordingly, **standard OLS coefficients and standard errors** were retained in the final analyses, and **Heteroscedasticity-Consistent Standard Errors (HCSEs)** were not required.

##### Model 1: PrEP Acceptability Score (Final Predictors)

This model included only the predictors that were significant at the bivariate screening stage. All core MLR assumptions were met without the need for corrective adjustments.

**Table 3: Multicollinearity (VIF Results)**

| Predictor                   | GVIF |
|-----------------------------|------|
| Number of clients per month | 1.13 |
| Knowledge Score             | 1.12 |
| Religion (collapsed)        | 1.43 |
| Ethnicity                   | 1.66 |
| Regular paying job          | 1.16 |
| Education (re-categorized)  | 1.24 |

##### Maximum

**VIF: 1.66**

*Interpretation:* All GVIF values are well below the threshold of 5, indicating no evidence of multicollinearity.

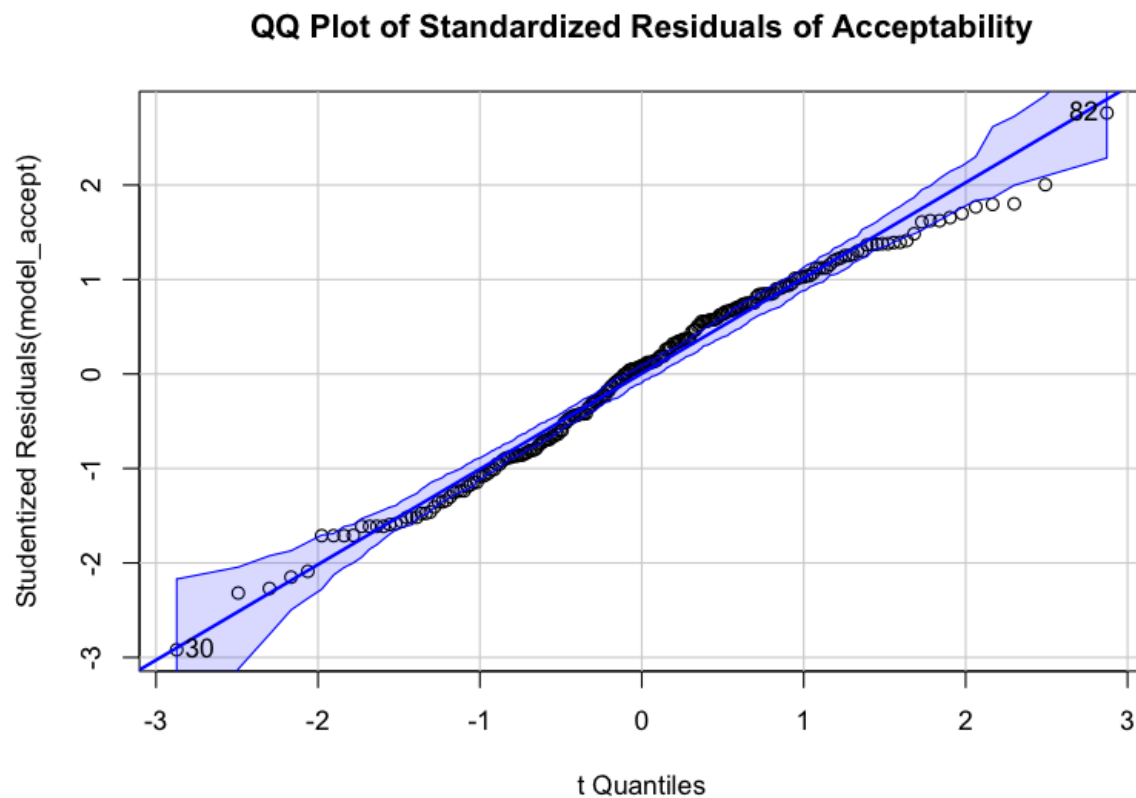

Figure 2. QQ plot of standardized residual of acceptability MLR model

# Acceptability and Willingness to Use HIV Pre-Exposure Prophylaxis among Female Sex Workers in Lagos State, Nigeria: A Cross-Sectional Study

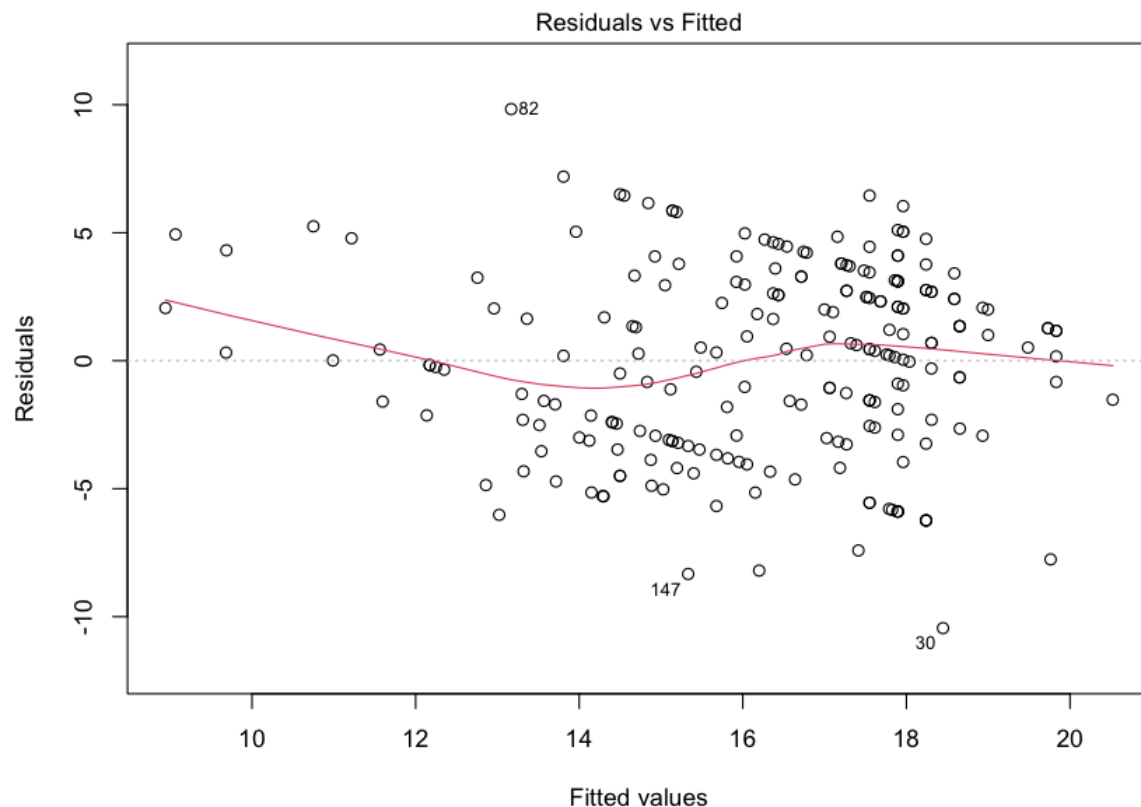

Figure 3. Residuals vs. Fitted plots (Homoscedasticity/Linearity) Acceptability

Table 4: Normality and Homoscedasticity of Residuals

| Diagnostic Check    | Value / Result               | Interpretation                                                                       |
|---------------------|------------------------------|--------------------------------------------------------------------------------------|
| Shapiro–Wilk test   | $W = 0.987$ , $p = 0.035$    | Minor statistical deviation from normality                                           |
| Breusch–Pagan test  | $\chi^2 = 6.36$ , $p = 0.61$ | No heteroscedasticity                                                                |
| NCV test            | $\chi^2 = 0.55$ , $p = 0.46$ | Constant variance                                                                    |
| Q–Q plot            | Fig. 2                       | Visual approximation to normality                                                    |
| Residuals vs fitted | Fig. 3                       | No pattern; Clear curvature suggests a <b>violation of the linearity assumption.</b> |

NCV= Non-Constant Variance

This study has been approved by the Lagos University Teaching Hospital Human Research Ethics Committee (LUTH-HREC Approval No: ADM/DCST/HREC/APP/5093).

### Model 2: PrEP Willingness Score (Final Predictors)

This model satisfied the homoscedasticity assumption, but the residuals did not meet strict normality per statistical testing.

**Table 5:. Multicollinearity (VIF Results)**

| Predictor                   | GVIF |
|-----------------------------|------|
| Age                         | 1.61 |
| Age at start (quartiles)    | 1.79 |
| Knowledge score             | 2.28 |
| Offered PrEP                | 2.08 |
| Religion (collapsed)        | 1.48 |
| Ethnicity                   | 1.73 |
| Regular paying job          | 1.11 |
| Number of clients per month | 1.08 |

**Maximum**

**VIF: 2.28**

*Interpretation:* All GVIF values are below 5, indicating stable parameter estimates and no multicollinearity concerns.

**QQ Plot of Standardized Residuals of Willingness**

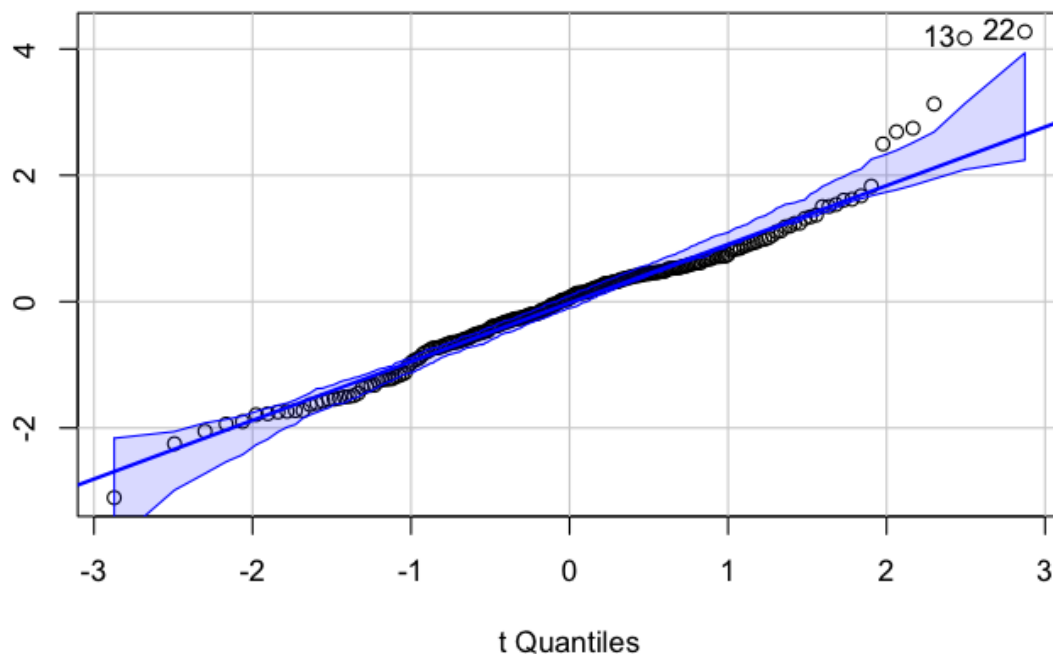

Figure 4: QQ plots of standardised residuals of willingness

This study has been approved by the Lagos University Teaching Hospital Human Research Ethics Committee (LUTH-HREC Approval No: ADM/DCST/HREC/APP/5093).



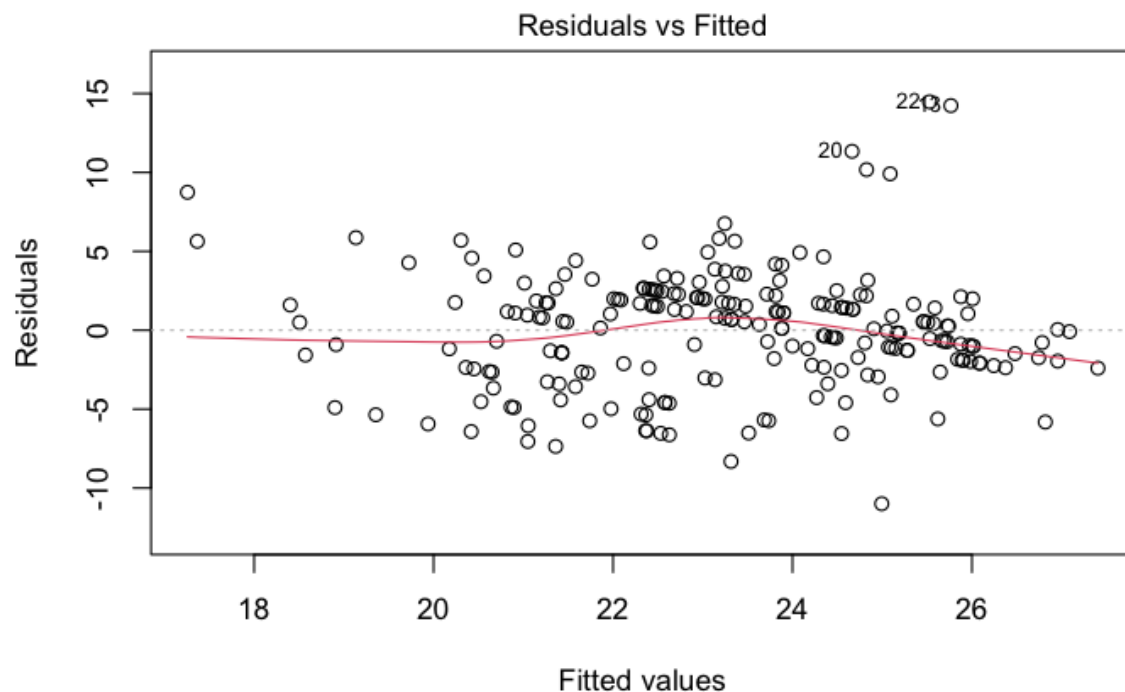

Figure 5: Residuals vs. Fitted plots (Homoscedasticity/Linearity) Willingness

**Table 6. Normality and Homoscedasticity of Residuals**

| Diagnostic Check          | Value / Result                 | Conclusion                                                                                                             |
|---------------------------|--------------------------------|------------------------------------------------------------------------------------------------------------------------|
| Shapiro–Wilk Test         | $W = 0.96777$ , $p < 0.0001$   | <b>Fail (Statistical):</b> Normality rejected                                                                          |
| Breusch–Pagan test        | $\chi^2 = 61.11$ , $p = 0.28$  | The model exhibits severe heteroskedasticity (non-constant variance of residuals).                                     |
| NCV test                  | $\chi^2 = 0.509$ , $p = 0.478$ | Contradictory to BP; The variance of the errors is constant.                                                           |
| Q–Q Plot                  | Fig 4                          | <b>Pass (Visual):</b> Residuals approximately normal (acceptable per Central Limit Theorem)                            |
| Residuals vs. Fitted Plot | Fig 5                          | Visual diagnostics confirm heteroskedasticity, while also showing a largely acceptable linearity with minor curvature. |

NCV= Non-Constant Variance

### Summary

Both adjusted multivariable linear regression models demonstrated overall acceptable adherence to key assumptions, with appropriate statistical and methodological corrections applied:

- **Multicollinearity:** No problematic multicollinearity was detected in either model (all VIFs were well below the common threshold of 5, with the highest VIF value being <3.0).
- **Homoscedasticity:** The assumption of constant variance was met in Model 1 (Acceptability scores, Breusch–Pagan test  $p=0.61$ ), but rejected in Model 2 (Willingness scores, Breusch–Pagan test  $p < 0.001$ ), indicating statistically significant heteroscedasticity in the latter. This violation was addressed by using HC3 heteroscedasticity-consistent standard errors across all final models to ensure reliable inference.
- **Normality of Residuals:** The assumption of normality was statistically rejected in both models (Shapiro–Wilk test  $p < 0.05$  for both). However, given the composite nature of the Likert-scale outcomes and the moderate-to-large sample size, this deviation is considered acceptable due to the robustness of the linear model and the invocation of the Central Limit Theorem. The use of HC3 standard errors further mitigates this non-normality concern.
- **Linearity:** The linearity assumption was visually acceptable in Model 1 (Acceptability) but showed minor curvature in Model 2 (Willingness). Despite this minor visual deviation, the assumption was considered broadly confirmed through residual diagnostics.
