# Supplementary material for: Acceptability and Willingness to Use HIV Pre-Exposure Prophylaxis among Female Sex Workers in Lagos State, Nigeria: A Cross-Sectional Study
Source: Research Square preprint supplement (doi:10.21203/rs.3.rs-7066966/v2), 2026-01-26
Supplement: Supplementary file 3 [file ea232e9367bbd2f91a5b813a.pdf]

# Acceptability and Willingness to Use HIV Pre-Exposure Prophylaxis among Female Sex Workers in Lagos State, Nigeria: A Cross-Sectional Study

Table S1: Acceptability of Pre-Exposure Prophylaxis

| <b>Likelihood of accepting PrEP as an HIV prevention method if it is made available in Nigeria under the following conditions</b> | <b>Very likely Freq. (%)</b> | <b>Likely Freq. (%)</b> | <b>Undecided Freq. (%)</b> | <b>Not likely Freq. (%)</b> | <b>Very Unlikely Freq. (%)</b> |
|-----------------------------------------------------------------------------------------------------------------------------------|------------------------------|-------------------------|----------------------------|-----------------------------|--------------------------------|
| It is free                                                                                                                        | 167(53.9)                    | 141(45.5)               | 2(0.6)                     | 0(0.0)                      | 0(0.0)                         |
| It is safe                                                                                                                        | 150(48.4)                    | 148(47.7)               | 12(3.9)                    | 0(0.0)                      | 0(0.0)                         |
| It is more than ninety per cent effective.                                                                                        | 138(44.5)                    | 68(21.9)                | 95(30.6)                   | 8(2.6)                      | 1(0.3)                         |
| It is a once daily pill                                                                                                           | 119(38.4)                    | 51(16.5)                | 55(17.7)                   | 75(24.2)                    | 10(3.2)                        |
| It is once monthly intramuscular injection                                                                                        | 11(3.5)                      | 50(16.1)                | 31(10.0)                   | 109(35.2)                   | 109(35.2)                      |
| It is a vaginal cream                                                                                                             | 16(5.2)                      | 45(14.5)                | 33(10.6)                   | 90(29.0)                    | 126(40.6)                      |

Acceptability of PrEP was highest if it was free (99.4%) or safe (96.1%). Daily pills were more acceptable (54.9%) than vaginal creams (19.7%) or monthly injections (19.6%). Effectiveness over 90% was acceptable to two-thirds (66.4%), though 30.6% remained undecided.

Table S2: Willingness to Use Pre-Exposure Prophylaxis

| <b>How likely would you be to take PrEP if</b>       | <b>Definitely will Freq. (%)</b> | <b>Probably will Freq. (%)</b> | <b>Not sure Freq. (%)</b> | <b>Probably will not Freq. (%)</b> | <b>Definitely will not Freq. (%)</b> |
|------------------------------------------------------|----------------------------------|--------------------------------|---------------------------|------------------------------------|--------------------------------------|
| You have access to free counselling on PrEP          | 157 (50.6)                       | 150 (48.4)                     | 1 (0.3)                   | 0 (0.0)                            | 2 (0.6)                              |
| It has immediate side effects                        | 30 (9.7)                         | 10 (3.2)                       | 35 (11.3)                 | 36 (11.6)                          | 199 (64.2)                           |
| It has long term effect on your health               | 2 (0.6)                          | 5 (1.6)                        | 70 (22.6)                 | 41 (13.2)                          | 192(61.9)                            |
| You must take a pill every day                       | 99 (31.9)                        | 80 (25.8)                      | 115 (37.1)                | 9 (2.9)                            | 7 (2.3)                              |
| Available as over the counter                        | 100 (32.3)                       | 142 (45.8)                     | 56 (18.1)                 | 2 (0.6)                            | 10 (3.2)                             |
| Must pay for the drug                                | 43 (13.9)                        | 86 (27.7)                      | 164 (52.9)                | 8 (2.6)                            | 9 (2.9)                              |
| Must see a healthcare worker before you get the drug | 96 (31.0)                        | 83 (26.8)                      | 104 (33.5)                | 14 (4.5)                           | 13 (4.2)                             |

This study has been approved by the Lagos University Teaching Hospital Human Research Ethics Committee (LUTH-HREC Approval No: ADM/DCST/HREC/APP/5093).

## Acceptability and Willingness to Use HIV Pre-Exposure Prophylaxis among Female Sex Workers in Lagos State, Nigeria: A Cross-Sectional Study

|                                           |           |           |            |          |          |
|-------------------------------------------|-----------|-----------|------------|----------|----------|
| Have to go HIV clinics to access the drug | 52 (16.8) | 60 (19.4) | 155 (50.0) | 20 (6.5) | 23 (7.4) |
|-------------------------------------------|-----------|-----------|------------|----------|----------|

---

Willingness to use PrEP is high with greater than 98% willing to use PrEP if they have access to counselling of PrEP. However about 70% of respondent are not willing to use PrEP if it has side effects or long-term effects on health.
